# Supplementary material
Source: Springer Nature journal article supplement (https://www.springermedizin.de/resource/supplementary/13256_2011_1827_MOESM1_ESM.pdf/9648528)

**A**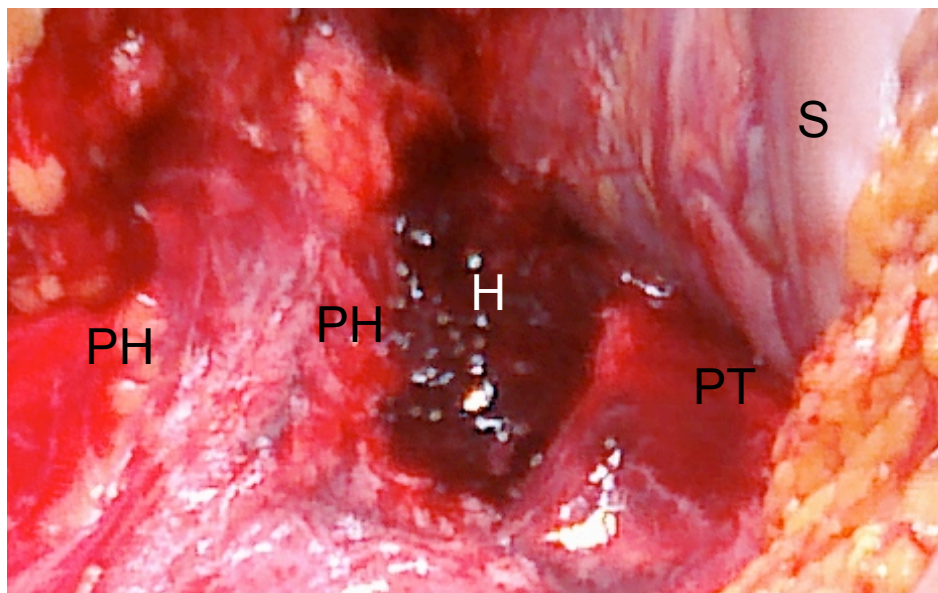**B**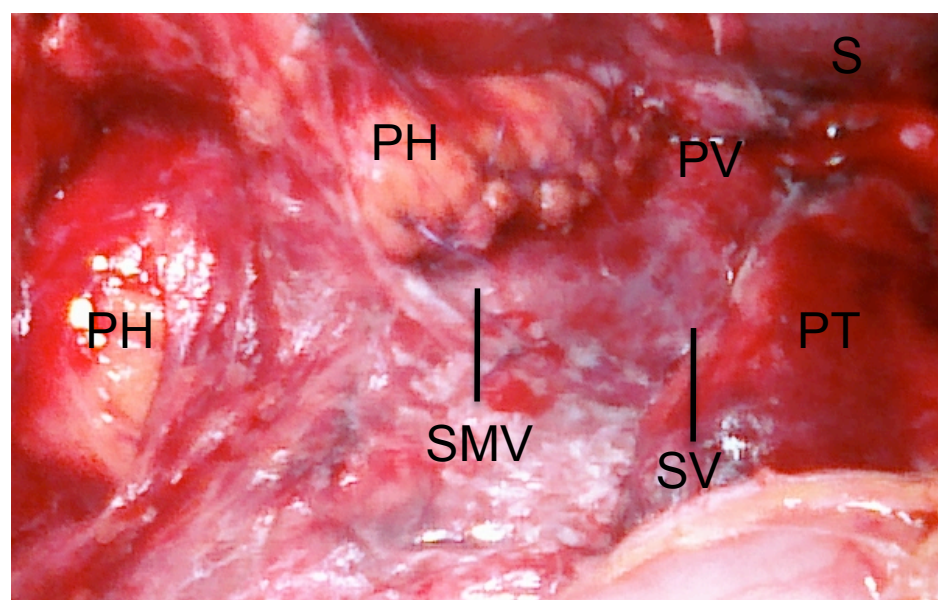**C**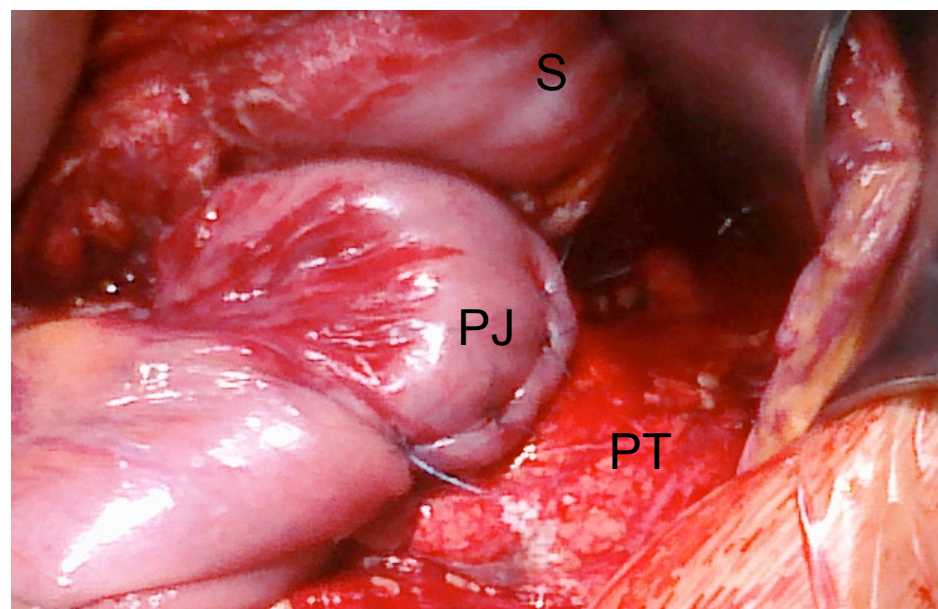

Supplement: MOESM1 [file 9648528]
